# Supplementary material
Source: Research Square preprint supplement (doi:10.21203/rs.3.rs-9050239/v1)
Supplement: Supplementary file 1 [file ebed193d5f0e2d765a65bf36.xlsx]

## Sheet: Sheet1
iteration (i)	Persisten Constraint (C)	IntenTional Direction (ID)	Affective Regulation (AR)	Misalignment (G)	Regulatory Fatige (RF)
1	0.5	1	0.8	0.2	0.2
2	0.5	0.95	0.86	0.09	0.29
3	0.5	0.9	0.887	0.013	0.303
4	0.5	0.85	0.8909	0.0409	0.3439
5	0.5	0.8	0.87863	0.07863	0.42253
6	0.5	0.75	0.855041	0.105041	0.527571
7	0.5	0.7	0.823529	0.123529	0.6511
8	0.5	0.65	0.78647	0.13647	0.78757
9	0.5	0.6	0.745529	0.145529	0.933099
10	0.5	0.55	0.70187	0.15187	1.08497
11	0.5	0.5	0.656309	0.156309	1.24128
12	0.5	0.45	0.609416	0.159416	1.40069
13	0.5	0.4	0.561592	0.161592	1.56229
14	0.5	0.35	0.513114	0.163114	1.7254
15	0.5	0.3	0.46418	0.16418	1.88958
16	0.5	0.25	0.414926	0.164926	2.05451
17	0.5	0.2	0.365448	0.165448	2.21995
18	0.5	0.15	0.315814	0.165814	2.38577
19	0.5	0.1	0.26607	0.16607	2.55184
20	0.5	0.05	0.216249	0.166249	2.71809
21	0.5	0	0.166374	0.166374	2.88446
22	0.5	-0.05	0.116462	0.166462	3.05092
23	0.5	-0.1	0.0665233	0.166523	3.21745
24	0.5	-0.15	0.0165663	0.166566	3.38401
25	0.5	-0.2	-0.0334036	0.166596	3.55061
26	0.5	-0.25	-0.0833825	0.166617	3.71723
27	0.5	-0.3	-0.133368	0.166632	3.88386
28	0.5	-0.35	-0.183357	0.166643	4.0505
29	0.5	-0.4	-0.23335	0.16665	4.21715
30	0.5	-0.45	-0.283345	0.166655	4.38381
31	0.5	-0.5	-0.333342	0.166658	4.55046
32	0.5	-0.55	-0.383339	0.166661	4.71712
33	0.5	-0.6	-0.433337	0.166663	4.88379
34	0.5	-0.65	-0.483336	0.166664	5.05045
35	0.5	-0.7	-0.533335	0.166665	5.21712
36	0.5	-0.75	-0.583335	0.166665	5.38378
37	0.5	-0.8	-0.633334	0.166666	5.55045
38	0.5	-0.85	-0.683334	0.166666	5.71711
39	0.5	-0.9	-0.733334	0.166666	5.88378
40	0.5	-0.95	-0.783334	0.166666	6.05045
41	0.5	-1	-0.833334	0.166666	6.21711
42	0.5	-1.05	-0.883333	0.166667	6.38378
43	0.5	-1.1	-0.933333	0.166667	6.55044
44	0.5	-1.15	-0.983333	0.166667	6.71711
45	0.5	-1.2	-1.03333	0.166667	6.88378
46	0.5	-1.25	-1.08333	0.166667	7.05044
47	0.5	-1.3	-1.13333	0.166667	7.21711
48	0.5	-1.35	-1.18333	0.166667	7.38378
49	0.5	-1.4	-1.23333	0.166667	7.55044
50	0.5	-1.45	-1.28333	0.166667	7.71711
